# Supplementary material for: Biological Effects of the Azaspiracid-Producing Dinoflagellate Azadinium dexteroporum in Mytilus galloprovincialis from the Mediterranean Sea
Source: PubMed Central journal article supplement (PMC6835248; doi:10.3390/md17100595), 2019-10-22
Supplement: marinedrugs-17-00595-s001.pdf [file marinedrugs-17-00595-s001.pdf]

SUPPLEMENTARY MATERIALS

# Biological Effects of the Azaspiracid-Producing Dinoflagellate *Azadinium dexteroporum* in *Mytilus galloprovincialis* from the Mediterranean Sea

Maria Elisa Giuliani <sup>1,†</sup>, Stefano Accoroni <sup>1,2,†</sup>, Marica Mezzelani <sup>1,†</sup>, Francesca Lugarini <sup>1</sup>, Simone Bacchiocchi <sup>2</sup>, Melania Siracusa <sup>2</sup>, Tamara Tavoloni <sup>2</sup>, Arianna Piersanti <sup>2</sup>, Cecilia Totti <sup>1</sup>, Francesco Regoli <sup>1</sup>, Rachele Rossi <sup>3</sup>, Adriana Zingone <sup>4</sup> and Stefania Gorbi <sup>1,\*</sup>

<sup>1</sup> Dipartimento di Scienze della Vita e dell'Ambiente, Università Politecnica delle Marche, Via Brecce Bianche, 60131 Ancona, Italy

<sup>2</sup> Istituto Zooprofilattico Sperimentale Umbria e Marche, Via Cupa di Posatora, 3, 60131 Ancona, Italy

<sup>3</sup> Istituto Zooprofilattico Sperimentale del Mezzogiorno, Via Salute 2, 80055 Portici (NA), Italy

<sup>4</sup> Dipartimento di Ecologia Marina Integrata, Stazione Zoologica Anton Dohrn, Villa Comunale, 80121 Napoli, Italy

\* Correspondence: s.gorbi@univpm.it; Tel.: +39-071-220-4142

† These authors equally contributed to this work.

Table S1. Chromatographic conditions utilised in LC-MS/MS analysis.

|                           |                                              |                           |                           |
|---------------------------|----------------------------------------------|---------------------------|---------------------------|
| <b>Column</b>             | Waters X-Bridge C18, 150 mm x 3mm; 5 $\mu$ m |                           |                           |
| <b>Run time</b>           | 27 min                                       |                           |                           |
| <b>Column temperature</b> | 40 °C                                        |                           |                           |
| <b>Injection volume</b>   | 10 $\mu$ l                                   |                           |                           |
| <b>Flow rate</b>          | 0.4 ml min <sup>-1</sup>                     |                           |                           |
| <b>Gradient</b>           | <b>Time (min)</b>                            | <b>Mobile phase A (%)</b> | <b>Mobile phase B (%)</b> |
|                           | 0                                            | 90                        | 10                        |
|                           | 2                                            | 90                        | 10                        |
|                           | 13                                           | 10                        | 90                        |
|                           | 18                                           | 10                        | 90                        |
|                           | 21                                           | 90                        | 10                        |
|                           | 27                                           | 90                        | 10                        |

Table S2. Ionspray source MS parameters.

| <b>Turbo IonSpray source</b>   |        |
|--------------------------------|--------|
| Temperature ( <b>TEM</b> )     | 600 °C |
| Ionspray voltage ( <b>IS</b> ) | 5000 V |
| Curtain gas ( <b>CUR</b> )     | 20 psi |
| Nebulizer Gas ( <b>GS1</b> )   | 60 psi |
| Auxiliary Gas ( <b>GS2</b> )   | 40 psi |
| CAD                            | Medium |

Table S3. Mass transitions and collision energy used for AZAs determination in Multiple Reaction Monitoring (MRM) experiments.

| Azaspiracids AZAs  | Precursor Ion (m/z) | Product Ion (m/z) | CE (eV) |
|--------------------|---------------------|-------------------|---------|
| <b>AZA-1</b>       | <sup>a</sup> 842    | 824               | 55      |
|                    |                     | 672               | 70      |
| <b>AZA-54</b>      | <sup>a</sup> 870    | 852               | 55      |
|                    |                     | 672               | 70      |
| <b>3-epi-AZA-7</b> | <sup>a</sup> 858    | 840               | 55      |
|                    |                     | 672               | 70      |
| <b>AZA-58</b>      | <sup>a</sup> 828    | 810               | 55      |
|                    |                     | 672               | 70      |
| <b>AZA-55</b>      | <sup>a</sup> 868    | 850               | 55      |
|                    |                     | 670               | 70      |

<sup>a</sup>Present as [M + H]<sup>+</sup>; CE= energy collision
